# Supplementary material for: Biosolids Benefit Yield and Nitrogen Uptake in Winter Cereals without Excess Risk of N Leaching
Source: MDPI journal article supplement (doi:10.3390/agronomy11081482), 2021-07-26
Supplement: s1 [file s1]

Archive with 1 entries (1 files):
- agronomy-1292254-supplementary.pdf
