# Supplementary material for: Biosolids Benefit Yield and Nitrogen Uptake in Winter Cereals without Excess Risk of N Leaching
Source: MDPI journal article supplement (doi:10.3390/agronomy11081482), 2021-07-26
Supplement: s1 [file s1 › agronomy-1292254-supplementary.pdf]

**Supplementary Table S1.** Nitrogen concentration ( $\text{g kg}^{-1}$ ) and content ( $\text{mg plant}^{-1}$ ) of vegetative aboveground parts (VAP) and roots as affected by year treatment in barley, common wheat, durum wheat and oat.

| Crop         | Year | N content |   |       |    |
|--------------|------|-----------|---|-------|----|
|              |      | VAP       |   | Roots |    |
| Barley       | 2015 | 15.0      | a | 21.1  | a  |
|              | 2017 | 9.8       | b | 12.8  | b  |
| Common wheat | 2015 | 27.6      | a | 17.5  | ns |
|              | 2017 | 17.3      | b | 13.9  | ns |
| Durum wheat  | 2015 | 27.0      | a | 18.0  | b  |
|              | 2017 | 18.2      | b | 23.2  | a  |
| Oat          | 2015 | 29.4      | a | 15.6  | ns |
|              | 2017 | 17.6      | b | 13.6  | ns |

Within crop, values followed by different letters are significantly different according to Tukey's test ( $P > 0.95$ ). ns=non significant.
